# Supplementary material
Source: PubMed Central journal article supplement (PMC7839664)
Supplement: NIHMS1662538-supplement-Supplemental_table_1.pdf [file NIHMS1662538-supplement-Supplemental_table_1.pdf]

Supplementary Table 1. Artificial antigen presenting cells used in this report.

| HLA class II Allele                | Cell line name | Host cell line | Selective media                           | Mean fluorescence intensity |                 |                 |                 |
|------------------------------------|----------------|----------------|-------------------------------------------|-----------------------------|-----------------|-----------------|-----------------|
|                                    |                |                |                                           | indirect staining           |                 | direct staining |                 |
|                                    |                |                |                                           | anti HLA class II           | secondary only  | anti HLA-DR     | isotype control |
| DRB1*01:01                         | L57.23         | DAP.3          | R10+200µg/mlG418                          |                             |                 | 86386           | 1070            |
| DRB1*04:07                         | L331.2         | DAP.3          | R10+200µg/mlG418                          | 12718                       | 413             |                 |                 |
| DRB1*04:11                         | L527.8         | DAP.3          | R10+200µg/mlG418                          | 19298                       | 921             |                 |                 |
| DRB1*11:04                         | L537.1         | DAP.3          | R10+200µg/mlG418                          | ND <sup>1</sup>             | ND <sup>1</sup> |                 |                 |
| DRB1*13:01                         | L597.2         | DAP.3          | R10+200µg/mlG418                          |                             |                 | 37737           | 1244            |
| DRB1*16:01                         | L415.2         | DAP.3          | R10+200µg/mlG418                          |                             |                 | 88773           | 992             |
| DRB3*01:01                         | TR81.19        | DAP.3          | R10+200µg/mlG418                          |                             |                 | 97055           | 1252            |
| DRB3*02:02                         | RRB3.02.2      | RM3            | R10 + 700µg/ml G418 + 12µg/ml Blasticidin |                             |                 | 9553            | 1177            |
| DRB5*01:01                         | IHW03304       | DAP.3          | R10                                       |                             |                 | 34448           | 1210            |
| DQA1*05:01/DQB1*03:01              | RQ0301.3       | RM3            | R10 + 700µg/ml G418 + 12µg/ml Blasticidin | 8231                        | 613             |                 |                 |
| DQA1*03:01/DQB1*03:02              | RQ0302.3       | RM3            | R10 + 700µg/ml G418 + 12µg/ml Blasticidin | 9444                        | 489             |                 |                 |
| DQA1*04:01/DQB1*04:02              | RQ0402.3       | RM3            | R10 + 700µg/ml G418 + 12µg/ml Blasticidin |                             |                 |                 |                 |
| DQA1*01:02/DQB1*05:02              | RQ0501.3       | RM3            | R10 + 700µg/ml G418 + 12µg/ml Blasticidin | 7895                        | 534             |                 |                 |
| DQA1*01:02/DQB1*06:02              | RQ0602.3       | RM3            | R10 + 700µg/ml G418 + 12µg/ml Blasticidin | 622                         | 311             |                 |                 |
| DPA1*01:03/DPB1*02:01 <sup>2</sup> | L256.12 (1H)   | DAP.3          | R10 + 200µg/mlG418                        | 351                         | 291             |                 |                 |
| DPA1*01:03/DPB1*04:01              | RP0401.2       | RM3            | R10 + 700µg/ml G418 + 12µg/ml Blasticidin | 1703                        | 447             |                 |                 |
| DPA1*01:03/DPB1*04:02 <sup>2</sup> | L25.4          | DAP.3          | R10 + 200µg/mlG418                        | ND <sup>1</sup>             | ND <sup>1</sup> |                 |                 |
| DPA1*02:01/DPB1*01:01              | RP0101.2       | RM3            | R10 + 700µg/ml G418 + 12µg/ml Blasticidin | 317                         | 241             |                 |                 |
| DPA1*02:01/DPB1*14:01              | RP1401.2       | RM3            | R10 + 700µg/ml G418 + 12µg/ml Blasticidin | 561                         | 273             |                 |                 |
| none                               | Parental DAP.3 | DAP.3          | R10                                       | NA <sup>3</sup>             | NA              | NA              | NA              |
| none                               | Parental RM3   | RM3            | R10                                       | NA                          | NA              | NA              | NA              |

<sup>1</sup> ND = data files not saved but visual inspection of fluorescence histograms shows specific expression of HLA with anti-HLA mAb staining

<sup>2</sup> Cells treated with sodium butyrate as indicated in Materials and Methods

<sup>3</sup> NA= not applicable to HLA-null cell lines
